# Supplementary material
Source: publisher site journal article supplement (https://static.cambridge.org/content/id/urn:cambridge.org:id:article:S0959270923000023/resource/name/S0959270923000023supp001.docx)
Supplement: Supplementary file 1 [file S0959270923000023supp001.docx]

**Appendix**

**Table A1** Overview of the environmental parameters recorded in the study area and their use in statistical analyses. If two or more variables were strongly intercorrelated, only one was used in multivariable analyses.

| **Parameters** | **Parameter type** | **Statistical analyses** |
| --- | --- | --- |
| **a) Bird data** |  |  |
| Territory selection (*BP vs. CONTROL*) | binomial | Tab. 1–2, Fig. 2, 3 |
| Mating success (*BP vs. UM*) | binomial | Tab. 3–4, Fig. 2, 4 |
|  |  |  |
| **b) Environmental data** |  |  |
| **Landscape structure 1** |  |  |
| Habitat type |  |  |
| Arable land 2 | metric | Tab. 1, 2a, 3a, Fig. 3 |
| *Maize* | metric | Tab. 1, 2c, 3c |
| *Winter barley* | metric | Tab. 1, 2c, 3c |
| *Winter rye* | metric | Tab. 1, 2c, 3c |
| *Winter wheat* | metric | Tab. 1, 2c, 3c |
| *Potato* | metric | Tab. 1, 2c, 3c |
| *Winter rape* | metric | Tab. 1, 2c, 3c |
| *Set-aside* | metric | Tab. 1, 2c, 3c |
| Woody boundary | metric | Tab. 1, 2a, 3a, Fig. 3 |
| *Avenue* | metric | Tab. 1, 2b, 3b |
| *Copse* | metric | Tab. 1, 2b, 3b |
| *Hedgerow* | metric | Tab. 1, 2b, 3b |
| *Single tree* | metric | Tab. 1, 2b, 3b |
| *Tree row* | metric | Tab. 1, 2b, 3b |
| Improved grassland 2 | metric | – |
| Semi-natural grassland | metric | Tab. 1, 2a, 3a |
| Ditch 3 | metric | – |
| Field margin 3 | metric | Tab. 1, 2a, 3a, Fig. 3 |
| Path/road 3 | metric | Tab. 1, 2a, |
| Coniferous forest | metric | Tab.1, 2a, 3a |
| Deciduous forest | metric | Tab. 1, 2a, 3a |
| Settlement | metric | Tab. 1, 2a, 3a |
| Landscape heterogeneity (Shannon Index) 3 | metric | Fig. 2 |
| **Habitat structure** |  |  |
| Vegetation height (cm) 4 | metric | Tab. 4 |
| Vegetation cover (%) 4 | metric | – |

1 Unit: ha, except Shannon Index (unitless).

2 Due to strong inter-correlations (|*rs*| > 0.6) between arable land and improved grassland, we used arable land in multivariable analyses.

3 Due to strong inter-correlations (|*rs*| > 0.6) between ditch, field margin, path/road and landscape heterogeneity, we only used field margin in multivariable analyses.

4 Due to strong inter-correlations (|*rs*| > 0.6) between vegetation height and vegetation cover, we used vegetation height in multivariable analyses. The parameter vegetation height was centred and squared prior to the GLMM analyses.
